# Supplementary material for: Freezing polystyrene-b-poly(2-vinylpyridine) micelle nanoparticles with different nanostructures and sizes
Source: Royal Society of Chemistry journal article supplement (doi:10.1039/c3sm53049c), 2014-01-01
Supplement: c3sm53049c.pdf [file c3sm53049c.pdf]

## Supplementary information

### Freezing polystyrene-*b*-poly(2-vinylpyridine) micelle nanoparticles with different nanostructures and sizes

Hailong Fan and Zhaoxia Jin\*

Department of Chemistry, Renmin University of China, Beijing 100872, P. R. China,

**Table S1.** Physical properties of related solvents and polymers.

|                                  | PS   | P2VP | acetone | THF  | H <sub>2</sub> O |
|----------------------------------|------|------|---------|------|------------------|
| $\delta$<br>[MPa] <sup>1/2</sup> | 18.6 | 21.7 | 19.7    | 18.5 | 80.1             |

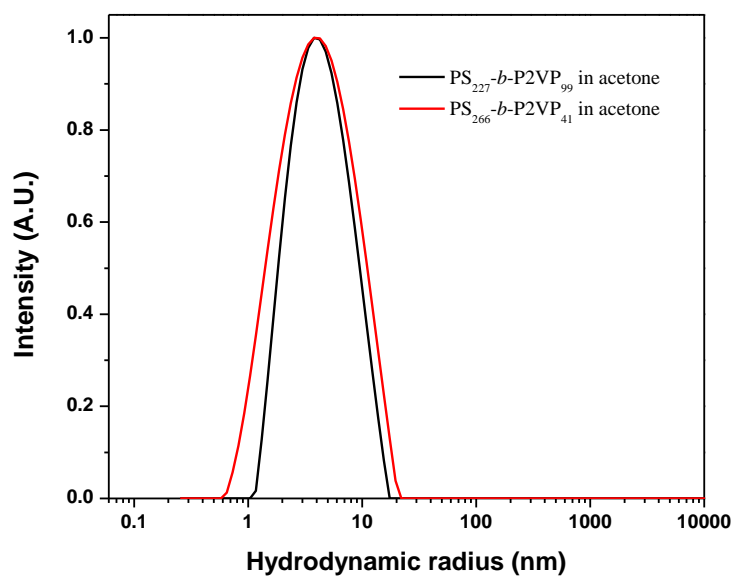

**Fig. S1** Hydrodynamic radius distributions of PS-*b*-P2VP acetone solutions based on dynamic light scattering characterizations.

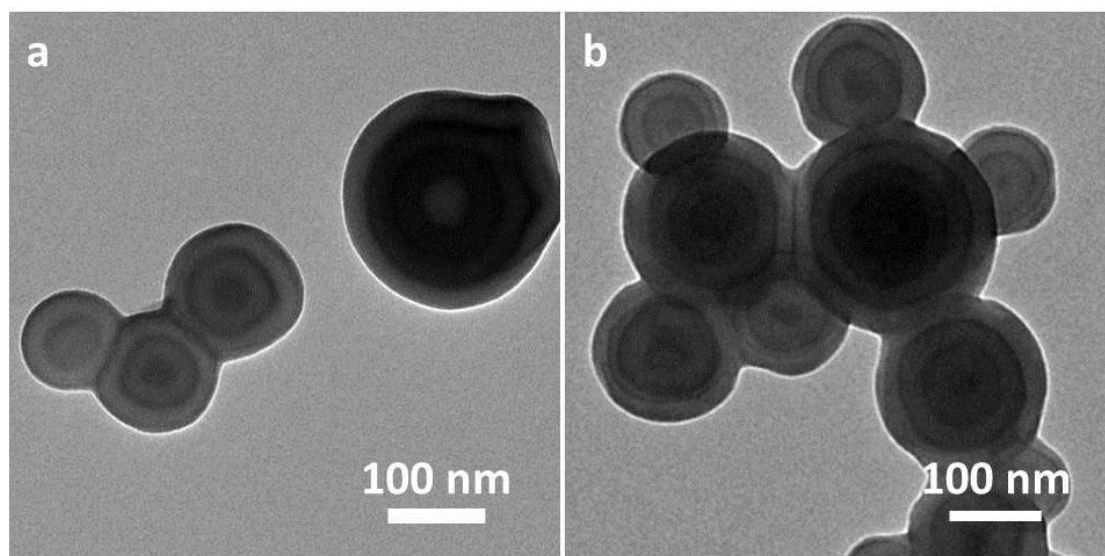

**Fig. S2** TEM images of PS-*b*-P2VP nanoparticles produced from acetone, (a) PS<sub>227</sub>-*b*-P2VP<sub>99</sub>, (b) PS<sub>312</sub>-*b*-P2VP<sub>74</sub>.

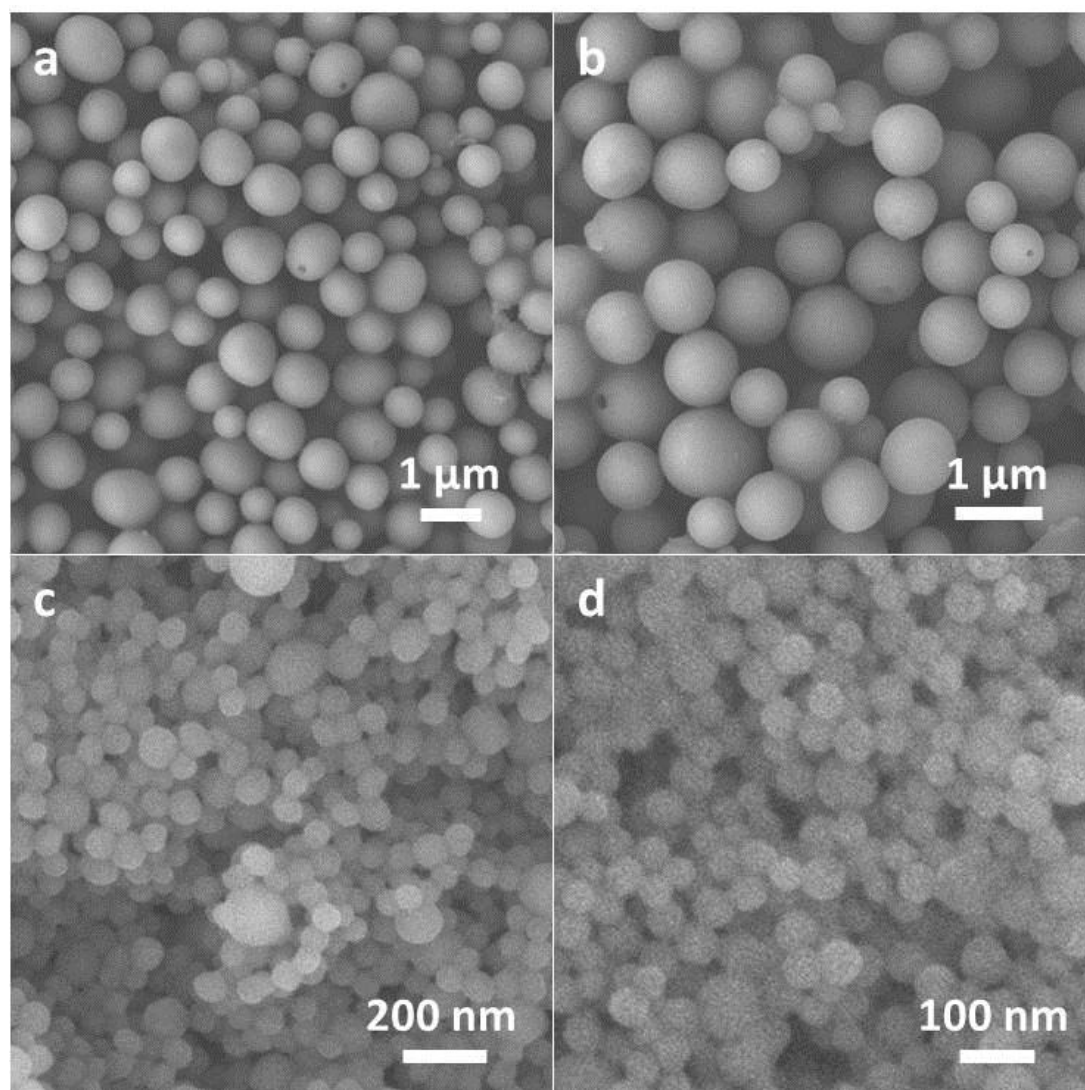

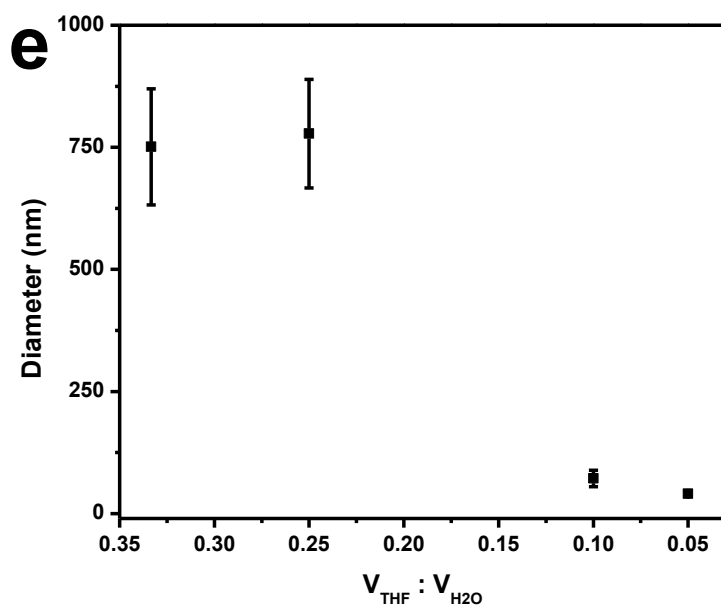

**Fig. S3** (a-d) SEM images of  $\text{PS}_{266}\text{-}b\text{-P2VP}_{41}$  nanoparticles produced from THF/water system, concentration is  $0.4 \text{ mg mL}^{-1}$ ,  $V_{\text{THF}}/V_{\text{H}_2\text{O}}$  is (a) 1:3, (b) 1:4, (c) 1:10, (d) 1:20, respectively. (e) The diameters of  $\text{PS}_{266}\text{-}b\text{-P2VP}_{41}$  nanoparticles obtained at different ratio of  $V_{\text{THF}}/V_{\text{H}_2\text{O}}$ .

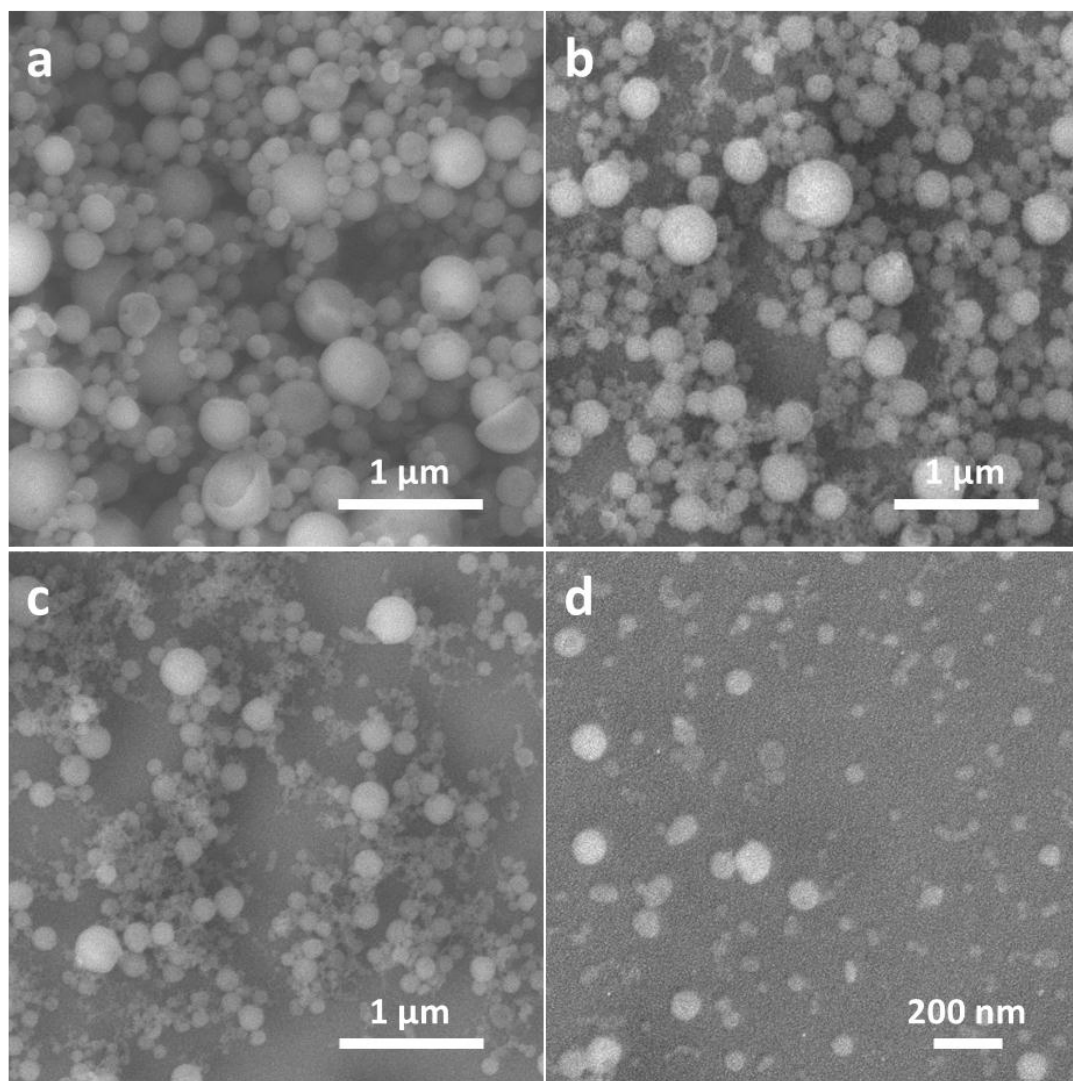

**Fig. S4** SEM images of  $\text{PS}_{266}\text{-}b\text{-P2VP}_{41}$  nanoparticles produced from acetone/water system, concentration is  $1.0 \text{ mg mL}^{-1}$ ,  $V_{\text{acetone}}/V_{\text{H}_2\text{O}}$  is (a) 1:0.5, (b) 1:1, (c) 1:2, (d) 1:5, respectively.

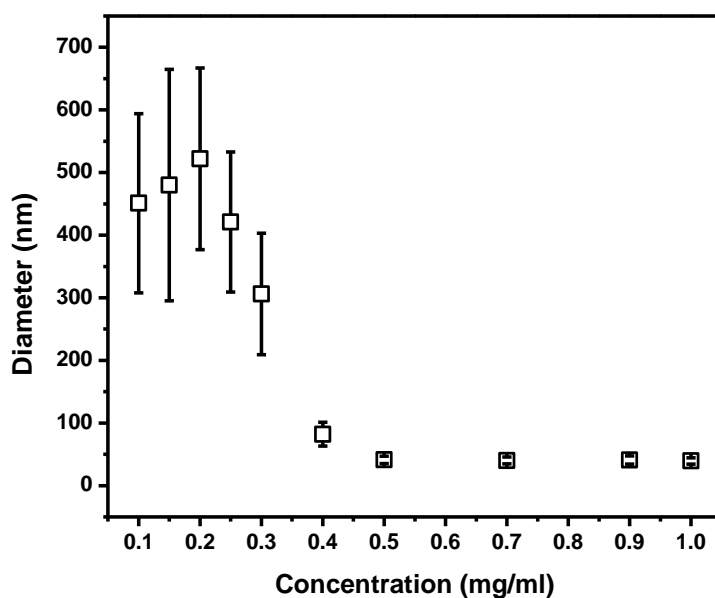

**Fig. S5** The variations of PS<sub>266</sub>-*b*-P2VP<sub>41</sub> nanoparticles diameter versus BCP concentrations with  $V_{\text{THF}}/V_{\text{H}_2\text{O}} = 1:10$ .

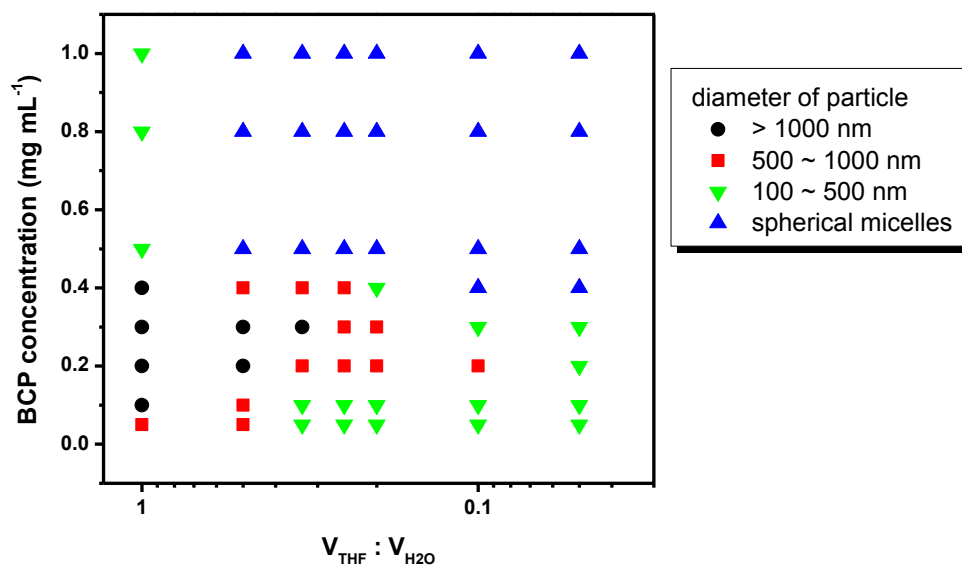

**Fig. S6** Phase diagram of relation between particle size, BCP concentration and the ratio of  $V_{\text{THF}}/V_{\text{H}_2\text{O}}$ .

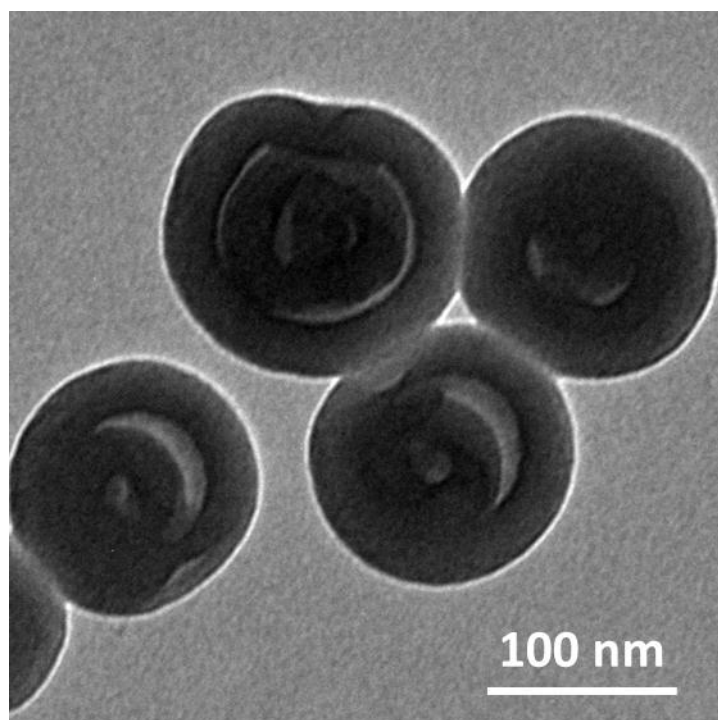

**Fig. S7** TEM image of partially-void nanoparticles generated from PBA@PS<sub>266</sub>-*b*-P4VP<sub>41</sub> after removal of PBA by ethanol. BCP concentration = 1.0 mg/ml,  $V_{\text{acetone}}:V_{\text{H}_2\text{O}} = 2:1$ , 2VP/PBA mol ratio is 1:1.
